# Supplementary material for: Estimated Cancer Risks Associated with Nitrosamine Contamination in Commonly Used Medications
Source: MDPI journal article supplement (doi:10.3390/ijerph18189465), 2021-09-08
Supplement: s1 [file s1]

## Supplemental Materials

### Estimated cancer risks associated with nitrosamine contamination in commonly used medications

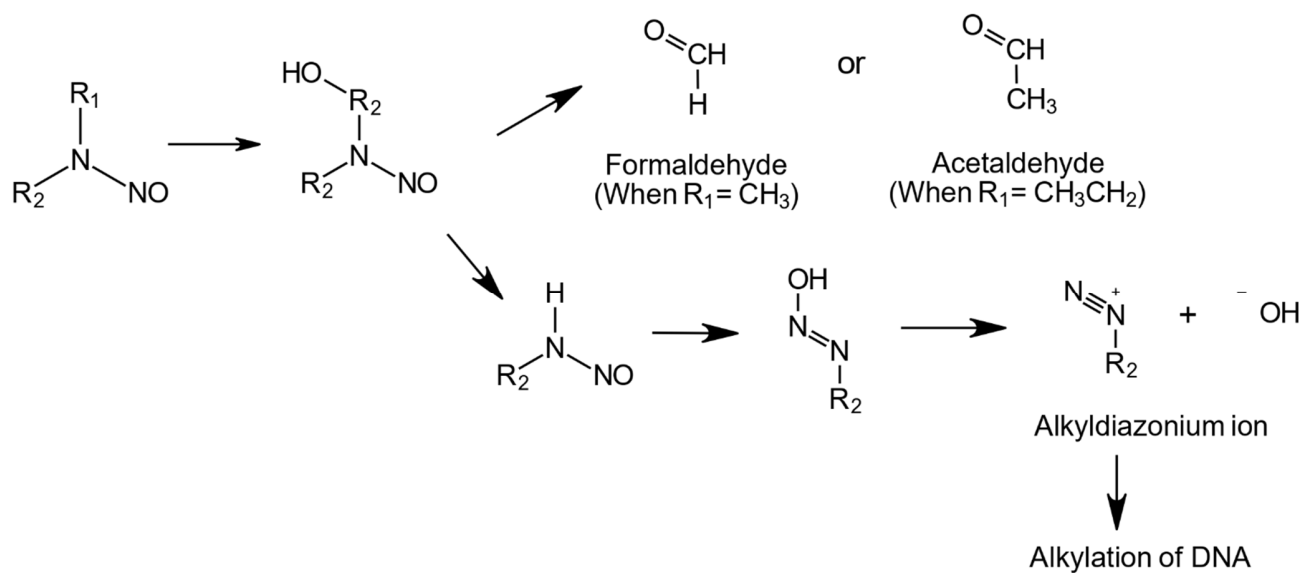

**Figure S1.** Metabolic activation of alkyl-nitrosamines and formation of an alkyl-diazonium ion.



NMA-C4 can be hydroxylated by CYP enzymes at the alpha carbon of either the methyl (center portion of figure) or alkyl group (right-hand portion of figure). This step leads to the formation of a hydroxy methyl alkyl nitrosamine followed by the formation of a mono alkyl nitrosamine and aldehydes. The mono alkyl nitrosamine spontaneously decomposes to form diazonium ions, which then can alkylate DNA. CYP enzymes can also oxidize NMAs at the non-alpha carbon of the alkyl chain (left-hand portion of figure). This leads to a variety of hydroxylated products and the downstream metabolites NMBA (N-nitrosomethyl-3-carboxypropylamine), MOP, and N-nitrososarcosine.

**Table S1.** Characterization of tumors (local vs systemic) in rats, hamsters, and mice exposed to NMAs (including NDMA), NDEA, and NMBA by various administration routes.

| Routes  | Oral           |      |                | Inhalation |                |      | In Utero |   |   | Intraperitoneal Injection |   |   | Subcutaneous Injection |      |      | Others <sup>1</sup> |           |           |
|---------|----------------|------|----------------|------------|----------------|------|----------|---|---|---------------------------|---|---|------------------------|------|------|---------------------|-----------|-----------|
| Species | R              | H    | M              | R          | H              | M    | R        | H | M | R                         | H | M | R                      | H    | M    | R                   | H         | M         |
| NDMA    | S              | L, S | S              | L, S       |                | L, S |          |   | S | S                         |   | S | S                      | S    | S    |                     |           |           |
| NDEA    | L, S           | L, S | L, S           | S          | L <sup>2</sup> |      | S        | S | S | S                         | S | S |                        | S    | L, S | S<br>(iv, ir)       | S<br>(sk) | S<br>(sk) |
| NMBA    | S              |      |                |            |                |      |          |   |   |                           |   |   |                        |      |      | L, S<br>(ives)      |           |           |
| NMA-C2  | L, S           | S    |                |            |                |      |          |   |   |                           |   |   |                        |      |      |                     |           |           |
| NMA-C3  | L, S           | S    |                |            |                |      |          | S |   |                           |   |   | S                      | S    | S    |                     |           |           |
| NMA-C4  | L, S           | L, S |                |            |                |      |          |   |   |                           |   |   |                        |      |      | S (ives)            |           |           |
| NMA-C5  | L <sup>3</sup> | L, S | L <sup>4</sup> |            |                |      |          |   |   | S                         | S | S | S                      |      |      | S (im)              |           |           |
| NMA-C6  | L, S           | L, S |                |            |                |      |          |   |   |                           |   |   |                        |      |      |                     |           |           |
| NMA-C7  | L, S           | L, S |                |            |                |      |          |   |   |                           |   |   | S                      |      |      |                     |           |           |
| NMA-C8  | S              | L, S |                |            |                |      |          |   |   |                           |   |   |                        |      |      |                     |           |           |
| NMA-C9  | S              |      |                |            |                |      |          |   |   |                           |   |   |                        |      |      |                     |           |           |
| NMA-C10 | L, S           |      |                |            |                |      |          |   |   |                           |   |   |                        |      |      |                     |           |           |
| NMA-C11 | L, S           |      |                |            |                |      |          |   |   |                           |   |   |                        |      |      |                     |           |           |
| NMA-C12 | L, S           | S    |                |            |                |      |          |   |   |                           |   |   |                        | L, S |      |                     |           |           |
| NMA-C14 | S              |      |                |            |                |      |          |   |   |                           |   |   |                        |      |      |                     |           |           |

R (rat); H (hamster); M (mouse); gray denotes not tested; L: local tumors; S: systemic tumors; L, S: both local and systemic tumors.

<sup>1</sup> Other routes abbreviated in parenthesis are intravenous injection (iv), intravesicular injection in bladder (ives), intramuscular injection (im), intrarectal insertion (ir) and skin application (sk).

<sup>2</sup> Tracheal, bronchial, and lung tumors were observed in hamsters.

<sup>3</sup> Esophageal and forestomach tumors were observed in rats in drinking water studies.

<sup>4</sup> Lingual, esophageal and forestomach tumors were observed in mice in drinking water studies.

**Table S2.** Additional information on the genotoxicity of NMAs (including NDMA), NDEA, and NMBA.

| Chemical Name<br>(Acronym), CAS<br>Number                  | Mutagenicity <sup>1</sup>                                                                                                                                                                                                                                                                                                                | Chromosomal<br>Effects <sup>2</sup>                                                                                                                                                                                                                                                                                                                                                                                                                                                                                                                                                                   | DNA<br>Damage/Nucleic<br>Acid or Protein<br>Binding <sup>2</sup>                                                                                                                                                                                                                                                                                                                                                                                | References                                                                                                                              |
|------------------------------------------------------------|------------------------------------------------------------------------------------------------------------------------------------------------------------------------------------------------------------------------------------------------------------------------------------------------------------------------------------------|-------------------------------------------------------------------------------------------------------------------------------------------------------------------------------------------------------------------------------------------------------------------------------------------------------------------------------------------------------------------------------------------------------------------------------------------------------------------------------------------------------------------------------------------------------------------------------------------------------|-------------------------------------------------------------------------------------------------------------------------------------------------------------------------------------------------------------------------------------------------------------------------------------------------------------------------------------------------------------------------------------------------------------------------------------------------|-----------------------------------------------------------------------------------------------------------------------------------------|
| N-<br>Nitrosodimethylamine<br>(NDMA or NMA-C1),<br>62-75-9 | + <i>In vivo</i> transgenic<br>rodent mutation<br>assay; +Chinese<br>hamster V79 and<br>ovary cells; +Mouse<br>lymphoma cells;<br>+SLRL mutation<br>assay in <i>Drosophila</i> ;<br>+ <i>Salmonella</i> ; + <i>E. coli</i> ;<br>+ <i>S. cerevisiae</i>                                                                                   | +MN in rat<br>hepatocytes, mouse<br>bone marrow and<br>hamster embryonic<br>fibroblasts ( <i>in vivo</i> );<br>+/-MN in rat bone<br>marrow ( <i>in vivo</i> );<br>+CAs in hamster<br>embryonic<br>fibroblasts ( <i>in vivo</i> )<br>and lung V79 cells<br>( <i>in vitro</i> ); +SCE in<br>human lymphocytes<br>and fibroblasts ( <i>in<br/>vitro</i> ), in mouse<br>bone marrow ( <i>in<br/>vivo</i> ), in mouse<br>hepatocytes, and<br>Chinese hamster<br>ovary cells, V79 cells<br>and primary lung<br>cells ( <i>in vitro</i> );<br>+/-SCE in Chinese<br>hamster bone<br>marrow ( <i>in vivo</i> ) | +DNA strand breaks<br>in mouse and rat<br>liver, kidney ( <i>in<br/>vivo</i> ); +DNA strand<br>breaks in human<br>lymphoma cells ( <i>in<br/>vitro</i> ); +DNA<br>adducts in several<br>human cells ( <i>in<br/>vitro</i> ); +DNA<br>adducts in rat liver,<br>lung, kidney ( <i>in<br/>vivo</i> ); +UDS in<br>human fibroblasts<br>and fetal mouse<br>kidney and liver,<br>mouse testes, rat<br>liver, respiratory<br>cells ( <i>in vitro</i> ) | OEHHA 2006<br>[50]; OEHHA<br>2014 [6];<br>OEHHA 1988<br>[22]; Morita<br>et al. 2016<br>[52],<br>Kawaguchi et<br>al. 2018 [49]           |
| N-Nitrosodiethylamine<br>(NDEA), 55-18-5                   | + <i>In vivo</i> transgenic<br>rodent mutation<br>assay; +Chinese<br>hamster V79 cells;<br>+ <i>Salmonella</i> TA100,<br>1530; + <i>E. coli</i> ; - <i>In vivo</i><br>dominant lethal<br>mutations in mice; + <i>In<br/>vivo</i> SLRL mutation<br>assay in <i>Drosophila</i> ;<br>+ <i>S. cerevisiae</i> ;<br>+ <i>Neurospora Crassa</i> | +/-MN in mice ( <i>in<br/>vivo</i> ); +CAs in<br>Chinese hamster<br>cells ( <i>in vitro</i> ); +SCE<br>in Chinese hamster<br>cells ( <i>in vitro</i> )                                                                                                                                                                                                                                                                                                                                                                                                                                                | +DNA strand breaks<br>in human<br>lymphoma cells ( <i>in<br/>vitro</i> ); +UDS in rat<br>liver cells ( <i>in vitro</i> );<br>+DNA adducts in<br>human bronchus,<br>colon and<br>esophageal tissues<br>( <i>in vitro</i> ); +DNA,<br>RNA adducts in rat,<br>hamster and mouse<br>liver, kidney ( <i>in<br/>vivo</i> )                                                                                                                            | IARC 1978<br>[34]; OEHHA<br>1988 [23];<br>Morita et al.<br>2016 [52];<br>Kawaguchi et<br>al. 2018 [49];<br>Yamazaki et<br>al. 1985 [51] |

| Chemical Name<br>(Acronym), CAS<br>Number                                                                             | Mutagenicity <sup>1</sup>                                                                      | Chromosomal<br>Effects <sup>2</sup> | DNA<br>Damage/Nucleic<br>Acid or Protein<br>Binding <sup>2</sup>                                                                                                                                   | References                                                                       |
|-----------------------------------------------------------------------------------------------------------------------|------------------------------------------------------------------------------------------------|-------------------------------------|----------------------------------------------------------------------------------------------------------------------------------------------------------------------------------------------------|----------------------------------------------------------------------------------|
| N-Nitroso-N-methyl-4-aminobutyric acid (NMBA), 61445-55-4<br>(metabolite of NMA-C4 and NMAs with longer alkyl chains) | +Yeast <i>D7-144</i> and <i>RMO52</i> ; + <i>Salmonella</i> TA1530; – <i>Salmonella</i> TA1535 | NT                                  | NT                                                                                                                                                                                                 | Mehta and von Borstel 1984 [53]; Lijinsky and Andrews 1983 [54]; CCRIS 2018 [48] |
| N-Nitrosomethylethylamine (NMA-C2), 10595-95-6                                                                        | +Chinese hamster V79 cells; + <i>Salmonella</i>                                                | NT                                  | +DNA strand breaks in human lymphoma cells ( <i>in vitro</i> ); +DNA adducts in rat liver, lung, kidney ( <i>in vivo</i> )                                                                         | IRIS 1987 [55]; OEHHHA 2014 [6]; Kawaguchi et al. 2018 [49]                      |
| N-nitrosomethyl-n-propylamine (NMA-C3), 924-46-9                                                                      | +Chinese hamster V79 cells; + <i>Salmonella</i> TA1530, 1535; + <i>E. coli</i> WP2 <i>uvrA</i> | NT                                  | +DNA adducts in rat esophagus, liver, lung, kidney ( <i>in vivo</i> )                                                                                                                              | OEHHHA 2014 [6]                                                                  |
| N-nitrosomethyl-n-butylamine (NMA-C4), 7068-83-9                                                                      | + <i>Salmonella</i> TA100, 1535; + <i>E. coli</i> WP2 <i>uvrA</i> , <i>hcr</i>                 | NT                                  | +DNA adducts in rat esophagus, liver, lung, kidney ( <i>in vivo</i> ); RNA and protein adducts in rat liver, kidney, pancreas, spleen ( <i>in vivo</i> )                                           | OEHHHA 2014 [6]                                                                  |
| N-nitrosomethyl-n-pentylamine (NMA-C5), 13256-07-0                                                                    | + <i>Salmonella</i> TA1535                                                                     | NT                                  | +DNA adducts in rat esophagus, nose, liver, trachea, lung, forestomach, kidney ( <i>in vivo</i> ); DNA adducts in rat esophagus, liver ( <i>in vitro</i> ); +8-oxodG in SD rats ( <i>in vivo</i> ) | OEHHHA 2014 [6]; Bonde et al. 2007 [56]; Mirvish et al. 1995 [57]                |
| N-nitrosomethyl-n-hexylamine (NMA-C6), 28538-70-7                                                                     | + <i>Salmonella</i> TA1535                                                                     | NT                                  | +DNA adducts in rat liver ( <i>in vivo</i> )                                                                                                                                                       | OEHHHA 2014 [6]                                                                  |

| Chemical Name (Acronym), CAS Number                              | Mutagenicity <sup>1</sup>  | Chromosomal Effects <sup>2</sup> | DNA Damage/Nucleic Acid or Protein Binding <sup>2</sup> | References     |
|------------------------------------------------------------------|----------------------------|----------------------------------|---------------------------------------------------------|----------------|
| N-nitrosomethyl- <i>n</i> -heptylamine (NMA-C7), 16338-99-1      | + <i>Salmonella</i> TA1535 | NT                               | +DNA adducts in rat liver ( <i>in vivo</i> )            | OEHHA 2014 [6] |
| N-nitrosomethyl- <i>n</i> -octylamine (NMA-C8), 34423-54-6       | + <i>Salmonella</i> TA1535 | NT                               | +DNA adducts in rat liver ( <i>in vivo</i> )            | OEHHA 2014 [6] |
| N-nitrosomethyl- <i>n</i> -nonylamine (NMA-C9), 75881-19-5       | + <i>Salmonella</i> TA1535 | NT                               | +DNA adducts in rat liver ( <i>in vivo</i> )            | OEHHA 2014 [6] |
| N-nitrosomethyl- <i>n</i> -decylamine (NMA-C10), 75881-22-0      | + <i>Salmonella</i> TA1535 | NT                               | +DNA adducts in rat lung, liver ( <i>in vivo</i> )      | OEHHA 2014 [6] |
| N-nitrosomethyl- <i>n</i> -undecylamine (NMA-C11), 68107-26-6    | + <i>Salmonella</i> TA1535 | NT                               | +DNA adducts in rat lung, liver ( <i>in vivo</i> )      | OEHHA 2014 [6] |
| N-nitrosomethyl- <i>n</i> -dodecylamine (NMA-C12), 55090-44-3    | + <i>Salmonella</i> TA100  | NT                               | +DNA adducts in rat lung, liver ( <i>in vivo</i> )      | OEHHA 2014 [6] |
| N-nitrosomethyl- <i>n</i> -tetradecylamine (NMA-C14), 75881-20-8 | NT                         | NT                               | NT                                                      | OEHHA 2014 [6] |

<sup>1</sup> Some negative or equivocal findings in *Salmonella* assays have been reported for NDMA, NDEA, and NMBA; however, the overall evidence indicates that NDMA, NDEA, and NMBA are mutagenic in one or more strains of *Salmonella*.

<sup>2</sup> Some negative or mixed findings in assays of DNA damage and chromosomal effects have been reported for NDMA and NDEA; however, the overall evidence indicates that NDMA and NDEA cause these effects.

“+” denotes positive results, “-” denotes negative results, “+/-” denotes some positive and some negative results, NT denotes not tested

SLRL mutations: Sex-linked recessive lethal mutations

SCE: Sister chromatid exchange

CAs: Chromosome aberrations

MN: Micronucleus

UDS: Unscheduled DNA synthesis

8-oxodG: 8-oxo-7,8-dihydro-2'-deoxyguanosine
